# Supplementary material for: Determinants of inappropriate setting allocation in the care of patients with type 2 diabetes: A population-based study in Reggio Emilia province
Source: PubMed Central journal article supplement (PMC6645528; doi:10.1371/journal.pone.0219965), 2019-07-22
Supplement: pone.0219965.s001.pdf [file pone.0219965.s001.pdf]

## S1 Table Eligibility criteria

| HEALTH CONDITION                                         | INDICATOR                               | ALGORITHM                                                                                                                     | SOURCES                          | NOTES                                                                         |
|----------------------------------------------------------|-----------------------------------------|-------------------------------------------------------------------------------------------------------------------------------|----------------------------------|-------------------------------------------------------------------------------|
| having HbA1c* on target                                  | HbA1c                                   | last 2015 HbA1c level $\leq 7\%$ (53 mmol/mol) if aged less than 75 or $\leq 8\%$ (64 mmol/mol) if aged equal or more than 75 | biochemistry laboratory database | if the measurement was unavailable, the subject was defined as unclassifiable |
| not being rapid-acting insulin user                      | drugs used other than ATC code = A10AB* | no rapid-acting insulin prescribed in 2015                                                                                    | drug prescription database       |                                                                               |
| not having mild or severe diabetes-related complications | hospital admission principal diagnosis  | no hospital admission in the 2012-2014 period for diabetes-related causes <sup>^</sup>                                        | hospital discharge database      |                                                                               |
| not having mild or severe renal complications            | GFR~                                    | last 2014-2015 GFR level $\geq 60$ ml/min/1.73m <sup>2</sup>                                                                  | biochemistry laboratory database | if the measurement was unavailable, the subject was defined as unclassifiable |

Eligibility criteria for integrated care plan of type 2 diabetes according to the Emilia-Romagna region guidelines [15]. \*HbA1c =glycated haemoglobin. ^ see S2 Table: ICDIX codes for diabetes-related diagnosis. ~ GFR=glomerular filtration rate. When not available, we estimated glomerular filtration rate by using serum creatinine and Modification of Diet in Renal Disease (MDRD) Study equation [30]
