# Supplementary material for: Determinants of inappropriate setting allocation in the care of patients with type 2 diabetes: A population-based study in Reggio Emilia province
Source: PubMed Central journal article supplement (PMC6645528; doi:10.1371/journal.pone.0219965), 2019-07-22
Supplement: pone.0219965.s002.pdf [file pone.0219965.s002.pdf]

## S2 Table ICD-IX codes

| ICD-IX                | Description                                                                                             |
|-----------------------|---------------------------------------------------------------------------------------------------------|
| 250.40                | Diabetes with renal manifestations, type II or unspecified type, not stated as uncontrolled             |
| 250.42                | Diabetes with renal manifestations, type II or unspecified type, uncontrolled                           |
| 250.50                | Diabetes with ophthalmic manifestations, type II or unspecified type, not stated as uncontrolled        |
| 250.52                | Diabetes with ophthalmic manifestations, type II or unspecified type, uncontrolled                      |
| 250.60                | Diabetes with neurological manifestations, type II or unspecified type, not stated as uncontrolled      |
| 250.62                | Diabetes with neurological manifestations, type II or unspecified type, uncontrolled                    |
| 250.70                | Diabetes with peripheral circulatory disorders, type II or unspecified type, not stated as uncontrolled |
| 250.72                | Diabetes with peripheral circulatory disorders, type II or unspecified type, uncontrolled               |
| 250.80                | Diabetes with other specified manifestations, type II or unspecified type, not stated as uncontrolled   |
| 250.82                | Diabetes with other specified manifestations, type II or unspecified type, uncontrolled                 |
| 250.90                | Diabetes with unspecified complication, type II or unspecified type, not stated as uncontrolled         |
| 250.92                | Diabetes with unspecified complication, type II or unspecified type, uncontrolled                       |
| 362.0*                | Diabetic retinopathy                                                                                    |
| 369*                  | Blindness and low vision                                                                                |
| 410*                  | Acute myocardial infarction                                                                             |
| 413*                  | Angina pectoris                                                                                         |
| 414*                  | Other forms of chronic ischemic heart disease (excluded 414.1 - Aneurysm and dissection of heart)       |
| 430                   | Subarachnoid haemorrhage                                                                                |
| 431                   | Intracerebral haemorrhage                                                                               |
| 432*                  | Other and unspecified intracranial haemorrhage                                                          |
| 434*                  | Occlusion of cerebral arteries                                                                          |
| 435.3                 | Vertebrobasilar artery syndrome                                                                         |
| 435.8                 | Other specified transient cerebral ischemias                                                            |
| 435.9                 | Unspecified transient cerebral ischemia                                                                 |
| 436*                  | Acute, but ill-defined, cerebrovascular disease                                                         |
| 437.1                 | Other generalized ischemic cerebrovascular disease                                                      |
| 440.21; 440.22; 443.9 | Claudication                                                                                            |
| 583*                  | Nephritis and nephropathy not specified as acute or chronic                                             |
| 585*                  | Chronic kidney disease (CKD)                                                                            |
| 707.9                 | Chronic ulcer of unspecified site                                                                       |
| V45.1; V56.0          | Renal dialysis status; Extracorporeal dialysis                                                          |
| V49.70-V49.76; 785.4  | Lower limb amputation status; gangrene                                                                  |

ICD-IX codes for diabetes-related diagnosis.
